# Supplementary material for: Magnetic aerogels from FePt and CoPt3 directly from organic solution
Source: Royal Society of Chemistry journal article supplement (doi:10.1039/d3nr05892a), 2024-01-01
Supplement: d3nr05892a1.pdf [file d3nr05892a1.pdf]

## Supporting Information:

### Magnetic Aerogels from FePt and CoPt<sub>3</sub> Directly from Organic Solution

L. Schoske<sup>[1,2,5,6]</sup>, F. Lübke<sup>[1,2]</sup>, I. Morales<sup>[1,2]</sup>, C. Wesemann<sup>[1]</sup>, J. G. Eckert<sup>[1,3]</sup>, R.T. Graf<sup>[1,4]</sup>, N. C. Bigall<sup>[1,2,3,4,5,6]</sup>

<sup>1</sup>Institute of Physical Chemistry and Electrochemistry, Leibniz University Hannover, Callinstr. 3a, 30167 Hannover, Germany

<sup>2</sup>Cluster of Excellence PhoenixD (Photonics, Optics and Engineering- Innovation Across Disciplines), Leibniz University Hannover, 30167 Hannover, Germany

<sup>3</sup>School of Additive Manufacturing, Ministry for Science and Culture of Lower Saxony, Hannover, Germany

<sup>4</sup>Laboratory of Nano and Quantum Engineering, Leibniz University Hannover, Schneiderberg 39, 30167 Hannover, Germany

<sup>5</sup> Institute of Physical Chemistry, University of Hamburg, Grindelallee 117, 20146 Hamburg, Germany

<sup>6</sup> The Hamburg Centre for Ultrafast Imaging, Hamburg, Germany

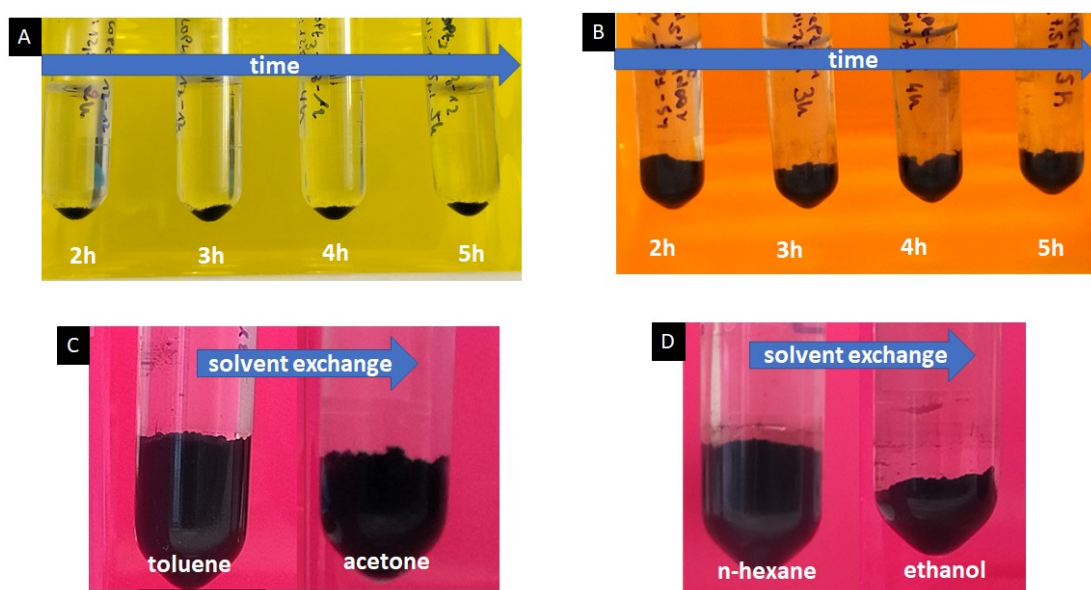

**Figure S1:** Gels after different gelation times for (A) CoPt<sub>3</sub> and (B) FePt particles and gels before and after solvent exchange for (C) CoPt<sub>3</sub> and (D) FePt particles.

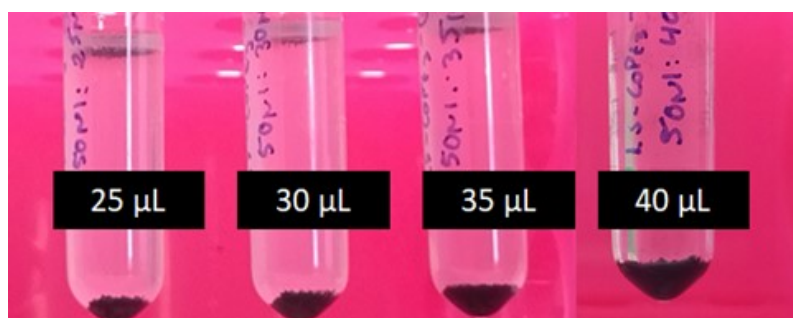

**Figure S2:** Gels with different volumes of added hydrazine for 50 µL CoPt<sub>3</sub> particles.

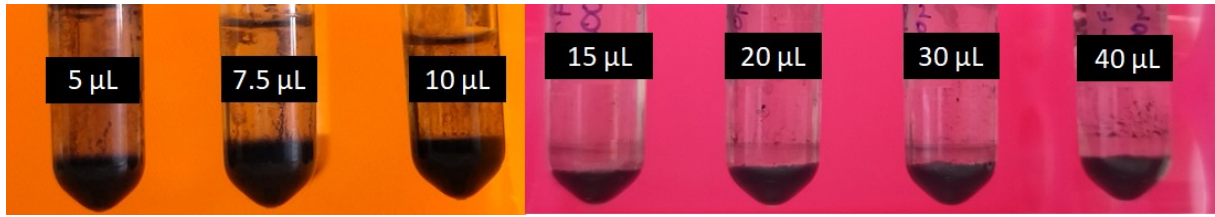

**Figure S3:** Gels with different volumes of added hydrazine for 100  $\mu\text{L}$  FePt particle solution.

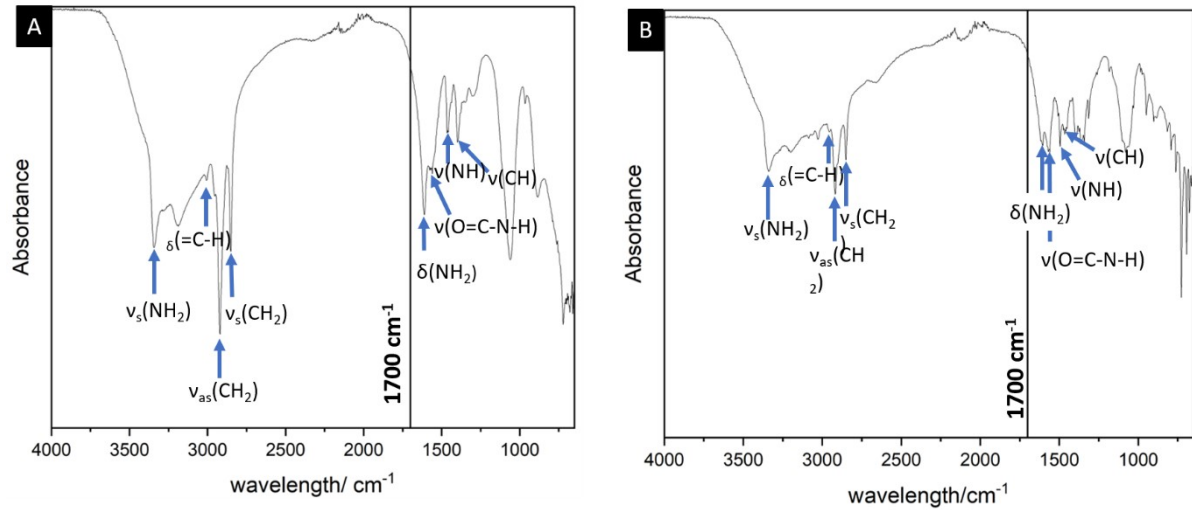

**Figure S4:** IR-spectra of mixtures from hydrazine, oleylamine and oleic acid (A) and hydrazine, hexadecylamine and 1-adamantecarboxylic acid (B).

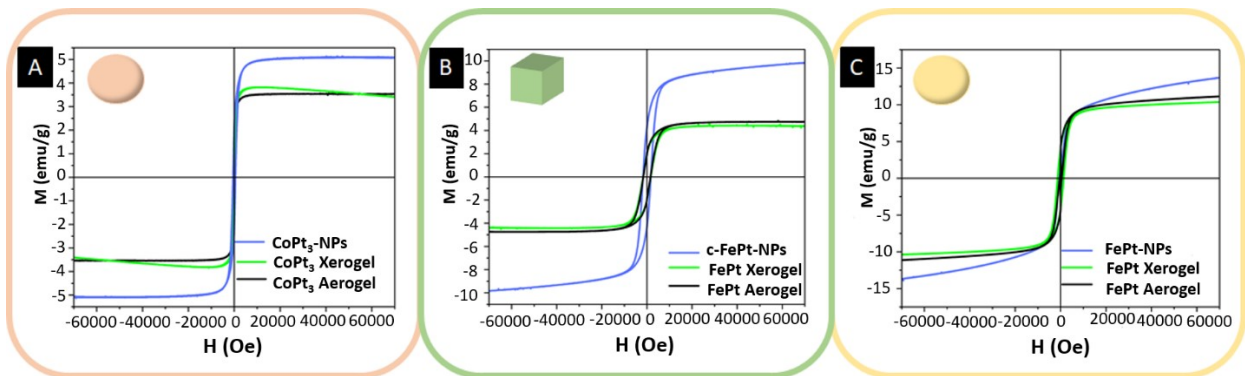

**Figure S5:** Hysteresis cycles measured at 5 K and 7 T before and after the gelation for  $\text{CoPt}_3$  (A), FePt quasi-cubic particles (B) and FePt dots (C).
